# Supplementary material for: Biosynthesis of Long-Chain Polyunsaturated Fatty Acids in Marine Gammarids: Molecular Cloning and Functional Characterisation of Three Fatty Acyl Elongases
Source: MDPI journal article supplement (doi:10.3390/md19040226), 2021-04-16
Supplement: s1 [file s1]

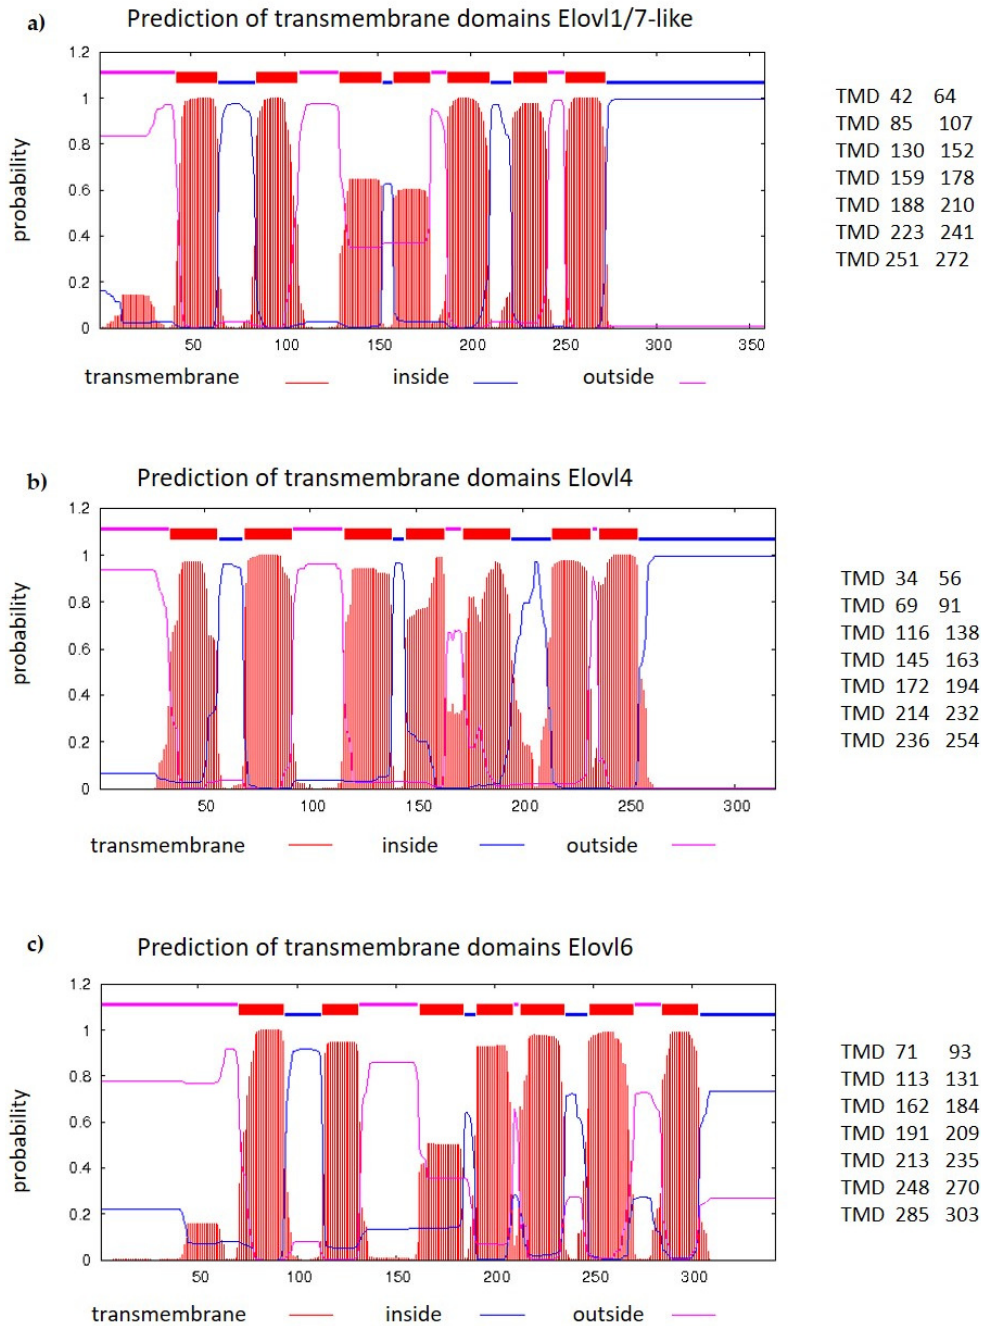

**Supplementary Figure S1.** Predicted transmembrane-spanning domains (TMD) of *E. marinus* (a) Elov1/7-like, (b) Elov4 and (c) Elov6. Inside-Cytosol; Outside-Lumen.

**Supplementary Table S1. (a)** Subcellular localisation prediction of the three Elovl proteins from *E. marinus* and (b) Elovl type determination. Prediction was obtained using the DeepLoc 1.0 online tool. Data are represented as % of likelihood.

**(a)**

|                      | Subcellular localisation (% likelihood) |               |                 |                  |               |            |           |         |         |               |
|----------------------|-----------------------------------------|---------------|-----------------|------------------|---------------|------------|-----------|---------|---------|---------------|
|                      | Endoplasmic reticulum                   | Cell membrane | Golgi apparatus | Lysosome/Vacuole | Mitochondrion | Peroxisome | Cytoplasm | Nucleus | Plastid | Extracellular |
| <b>ELOVL1/7-LIKE</b> | 79.85                                   | 10.74         | 5.96            | 3.42             | 0.02          | 0          | 0         | 0       | 0       | 0             |
| <b>ELOVL4</b>        | 87.77                                   | 5.75          | 4.76            | 1.68             | 0.02          | 0          | 0         | 0       | 0       | 0             |
| <b>ELOVL6</b>        | 81.62                                   | 6.71          | 6.12            | 5.22             | 0.17          | 0.14       | 0.01      | 0       | 0       | 0             |

**(b)**

|                      | Protein type (% likelihood) |          |
|----------------------|-----------------------------|----------|
|                      | Soluble                     | Membrane |
| <b>ELOVL1/7-LIKE</b> | 0                           | 100      |
| <b>ELOVL4</b>        | 0.01                        | 99.99    |
| <b>ELOVL6</b>        | 0.01                        | 99.99    |
